# Supplementary material for: Establishment of a Pediatric Surgical Unit at a University Hospital in Eastern Africa
Source: MDPI journal article supplement (doi:10.3390/children8030244), 2021-03-22
Supplement: s1 [file s1]

# Erfahrungsbericht JimmaChild

über den Einsatz in Jimma

XXX

## 1 Einleitung

### 1.1 Eckdaten Ihres Einsatzes

|                                                                                                                                                             |  |
|-------------------------------------------------------------------------------------------------------------------------------------------------------------|--|
| Einsatzzeitraum und Ausbildungsabschnitt, den Sie unterstützt haben                                                                                         |  |
| Der wievielte Einsatz ist dies in Jimma?                                                                                                                    |  |
| Waren Sie außerhalb des Programmes JimmaChild bereits beruflich in einem Entwicklungsland tätig (falls ja, bitte kurze Angabe von Land, Dauer und Aufgabe)? |  |

### 1.2 Was war Ihre Motivation für und was waren Ihre Erwartungen an den Einsatz /das Programm?

|  |
|--|
|  |
|--|

## 2 Tätigkeit vor Ort

### 2.1 Bitte beschreiben und bewerten Sie die Vorbereitungsphase (medizinisch, kulturell, logistisch etc).

|  |
|--|
|  |
|--|

Wie gut waren Sie auf die Vorgänge am Jimma Krankenhaus vorbereitet?

☐☐☐☐☐

Sehr gut

Gut

Befriedigend

Ausreichend

Mangelhaft

Warum? Bitte teilen Sie uns mit, was wir besser machen könnten, um Ihre Vorbereitung zu unterstützen.

|  |
|--|
|  |
|--|

### 2.2 Beschreiben und bewerten Sie die Wohn- und Lebenssituation und die Begleitung während Ihrer Zeit vor Ort (z.B. medizinische Notfallunterstützung, Unterstützung bei kultureller Anpassung)

|  |
|--|
|  |
|--|

Wie bewerten Sie die Begleitung vor Ort?

☐

Sehr gut

☐

Gut

☐

Befriedigend

☐

Ausreichend

☐

Mangelhaft

Warum? Bitte teilen Sie uns mit, was wir besser machen könnten, um die Begleitung / Unterstützung vor Ort zu verbessern.

**2.3 Bitte fassen Sie die Tätigkeiten der äthiopischen Ärzte gemäß Curriculum und was Sie spezifisch dazu beigetragen haben zusammen**

**2.4 Beschreiben und bewerten Sie die Zusammenarbeit mit den äthiopischen Kollegen (z.B. Atmosphäre, Qualität der Zusammenarbeit, Engagement des Teams, etc.) und geben Sie eine Einschätzung, ob sich das Team / die medizinische Fakultät mit dem Programm identifizieren**

Wie gut konnten Sie Ihre vorgesehene unterstützende (im Gegensatz zur leitenden) Rolle wahrnehmen?

☐

Sehr gut

☐

Gut

☐

Zum Teil

☐

Eher nicht

☐

Überhaupt nicht

Woran lag das? Wie könnte man Ihre Rolle besser in Wert setzen?

**2.5 Bitte bewerten und machen Sie Verbesserungsvorschläge für das Curriculum (z.B. bzgl. Relevanz der Ausbildungsinhalte und Anpassung an lokale Gegebenheiten, Ausbildungsformate etc.)**

**2.6 Beschreiben und bewerten Sie die Qualität der Nachbereitung Ihres Einsatzes (z.B. Übergabeprozesse an Sie und Sie an Ihren Nachfolger, Tipps für Nachfolger, Debriefing mit dem Haunerschen Team)**

Wie gut konnten Sie Ihre Erfahrungen an Ihren Nachfolger und für die Verbesserung des Programms weitergeben?

|                          |                          |                          |                          |                          |
|--------------------------|--------------------------|--------------------------|--------------------------|--------------------------|
| <input type="checkbox"/> |
| Sehr gut                 | Gut                      | Ausreichend              | Nicht ausreichend        | Überhaupt nicht          |

Warum? Bitte teilen Sie uns mit, wie wir in Zukunft Ihren Erfahrungsschatz besser abschöpfen und für das Programm nutzen können.

Wie bewerten Sie die allgemeine Unterstützung durch das Projektteam der Haunerschen?

|                          |                          |                          |                          |                          |
|--------------------------|--------------------------|--------------------------|--------------------------|--------------------------|
| <input type="checkbox"/> |
| Sehr gut                 | Gut                      | Befriedigend             | Ausreichend              | Mangelhaft               |

Warum? Bitte teilen Sie uns mit, wie wir Sie / die äthiopischen KollegInnen in Zukunft besser unterstützen könnten

**2.7 Wir würden uns über Empfehlungen für das Programm freuen (z.B. welche Chancen und Risiken für die Einführung der kinderchirurgischen Lehre an der JU sehen Sie, wie kann der Wissenstransfer an äthiopische KollegInnen noch besser gelingen etc.)**

**2.8 Bitte erläutern Sie welchen persönlichen und fachlichen Zugewinn dieser Einsatz für Sie hatte und geben Sie uns eine Indikation, ob Sie sich bereit erklären, noch einen Einsatz in Jimma zu machen. Welche Ihrer eingangs genannten Erwartungen konnte erfüllt werden, welche nicht?**

Wie hoch ist Ihre Bereitschaft als Multiplikator tätig zu werden nach Ihrem Einsatz (daher sich dafür zu engagieren, ähnliche Kooperationen umzusetzen)?

☐

Hoch

☐

Mittel

☐

Gering

Warum? Wenn Bereitschaft besteht, wie wollen Sie aktiv werden und welche Ideen haben Sie?

### 3 Entwicklungen in der kinderchirurgischen Abteilung Jimma

#### 3.1 Umfeldanalyse Kinderchirurgie

Geben Sie den Status der kinderchirurgischen Abteilung an (bitte nach jedem Besuch ausfüllen)

| Bestandteile                                                                 | Status |
|------------------------------------------------------------------------------|--------|
| 1) OP-Saal ausschließlich für Kinderchirurgie steht zur Verfügung            | 1)     |
| 2) Kinder unter 2 Monaten werden auf neugeborenen Intensivstation versorgt   | 2)     |
| 3) Es gibt 20 Betten für Patienten im Alter zwischen 2 Monaten und 15 Jahren | 3)     |
| 4) Feste Zuteilung von OP-Schwestern für die Abteilung                       | 4)     |
| 5) Feste Zuteilung von Pflegeschwestern für die Abteilung                    | 5)     |
| 6) Andere Indikatoren                                                        | 6)     |

#### 3.2 Bei weiteren Einsätzen: Bitte beschreiben Sie Veränderungen der allgemeinen Bedingungen in der kinderchirurgischen Abteilung ggü. letztem Besuch

Wie bewerten Sie das klinische Umfeld im Vergleich zu Ihrem letzten Besuch?

☐☐☐

Besser

Gleich

Weniger gut

Warum?

|  |
|--|
|  |
|--|

Bitte beschreiben Sie Änderungen hinsichtlich folgender Punkte:

| Bestandteile                                                            | Status |
|-------------------------------------------------------------------------|--------|
| 1) Allgemeiner baulicher Zustand                                        | 1)     |
| 2) Ausstattung                                                          | 2)     |
| 3) Hygiene und Pflegesituation                                          | 3)     |
| 4) Diagnostische Standards und Verfahren                                | 4)     |
| 5) Therapeutische Standards und Verfahren                               | 5)     |
| 6) Organisation (work-flow, Krankenhausmanagement)                      | 6)     |
| 7) Ganzheitliche Behandlung und Pflege                                  | 7)     |
| 8) Einbezug der Eltern<br>/Patientenkommunikation                       | 8)     |
| 9) Zusammenarbeit mit Pflegepersonal (OP-Schwestern und Pflegepersonal) | 9)     |

## **Anlagen**

Annex 1:        Ausbildungsfortschritte der äthiopischen KollegInnen

Annex 2:        Weitere Anlagen nach Belieben (z.B: Fotos etc.)
